# Supplementary material for: A CO2-responsive smart fluid based on supramolecular assembly structures varying reversibly from vesicles to wormlike micelles
Source: Royal Society of Chemistry journal article supplement (doi:10.1039/d0ra03854g), 2020-01-01
Supplement: d0ra03854g1.pdf [file d0ra03854g1.pdf]

## Supporting information

### A CO<sub>2</sub>-Responsive Smart Fluid Based on Supramolecular Assembly Structures Varying Reversibly From Vesicles to Wormlike Micelles

Chunming Xiong, Falin Wei, Qiang Zhou, Kang Peng\*, Zhengrong Ye and Haiyang Yang\*

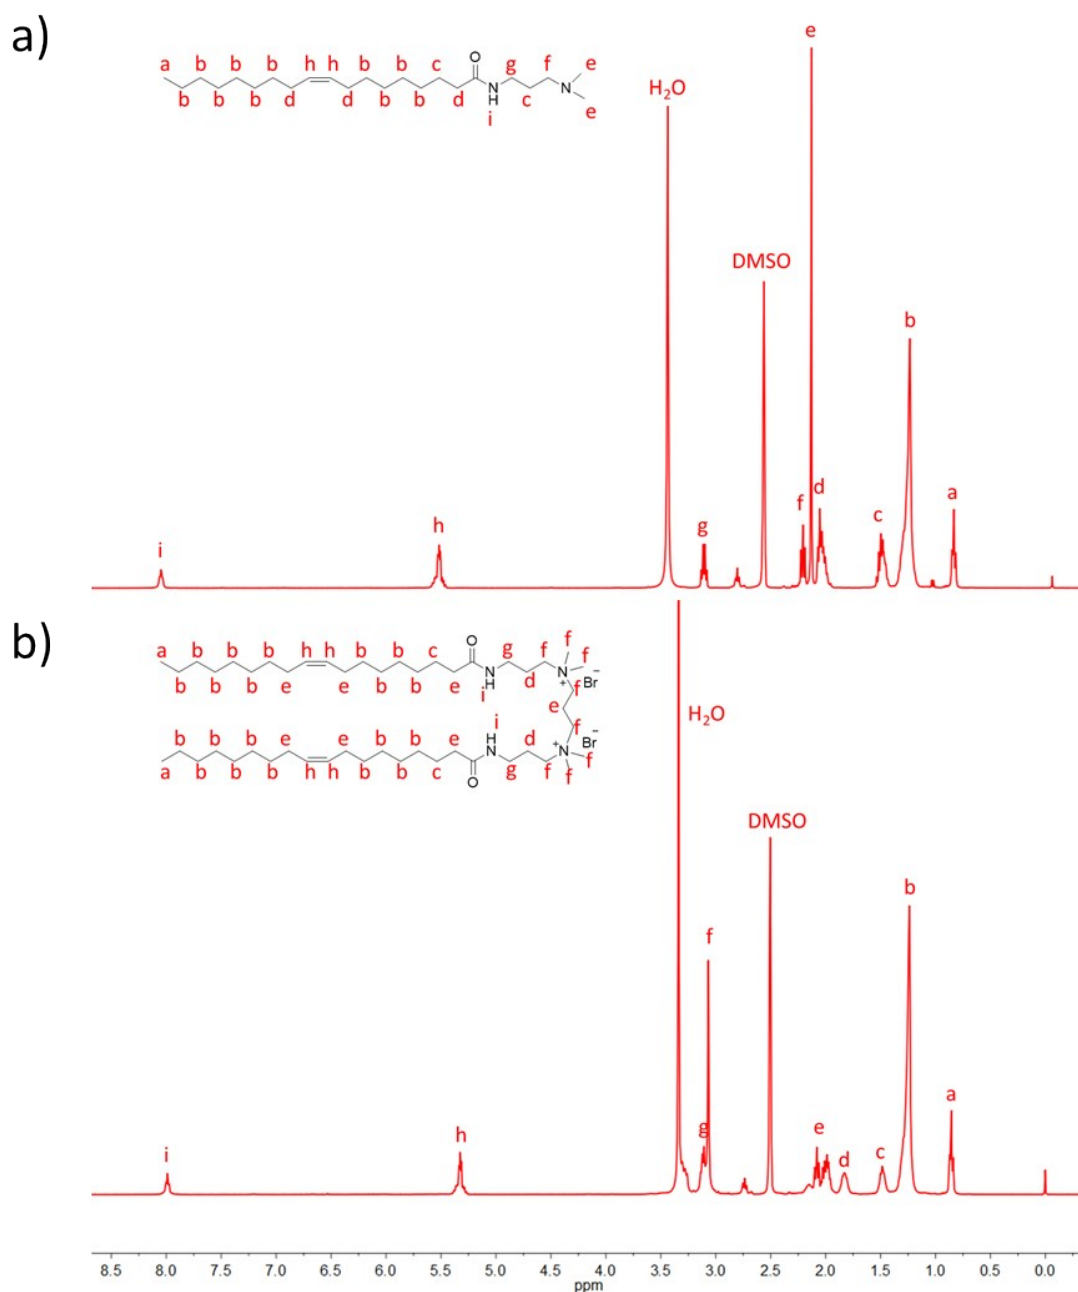

Figure S1. <sup>1</sup>H NMR spectra of (a) N-[3 (dimethylamino) propyl] oleamide (NDPO) and (b) gemini cationic surfactant -- trimethylene α, ω-bis (oleate amide propyl dimethyl ammonium bromide).

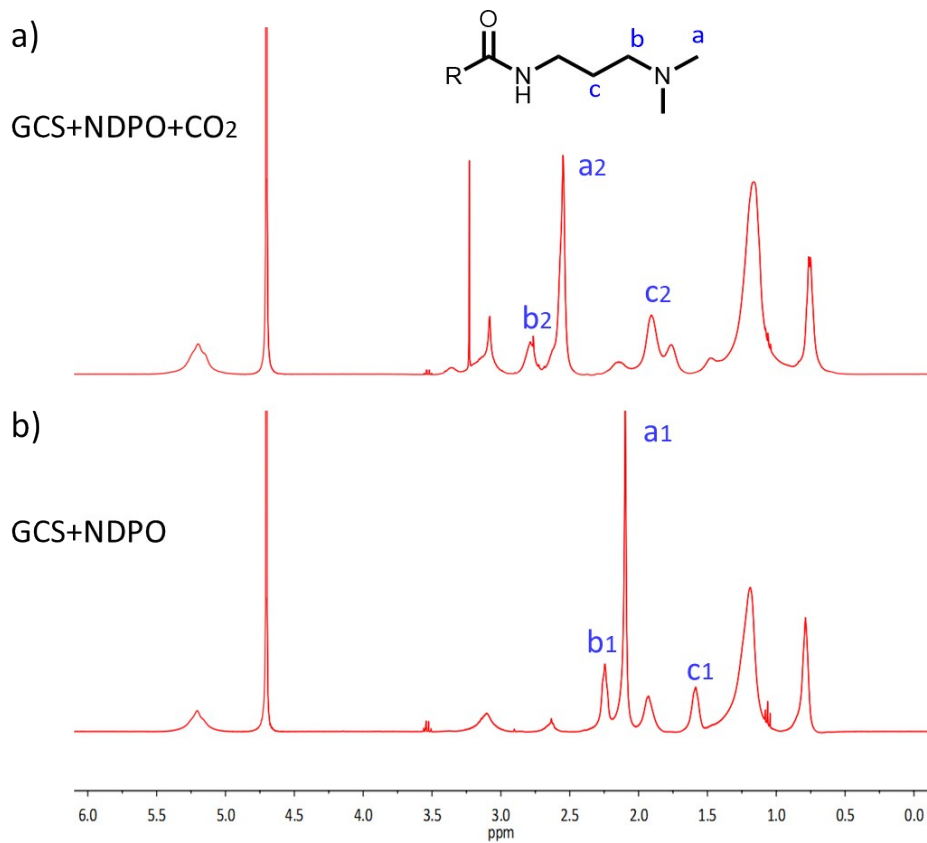

**Figure S2.** Comparison of the <sup>1</sup>H NMR spectra for G<sub>70</sub> sample in the presence and absence of CO<sub>2</sub>. The solvent is D<sub>2</sub>O.

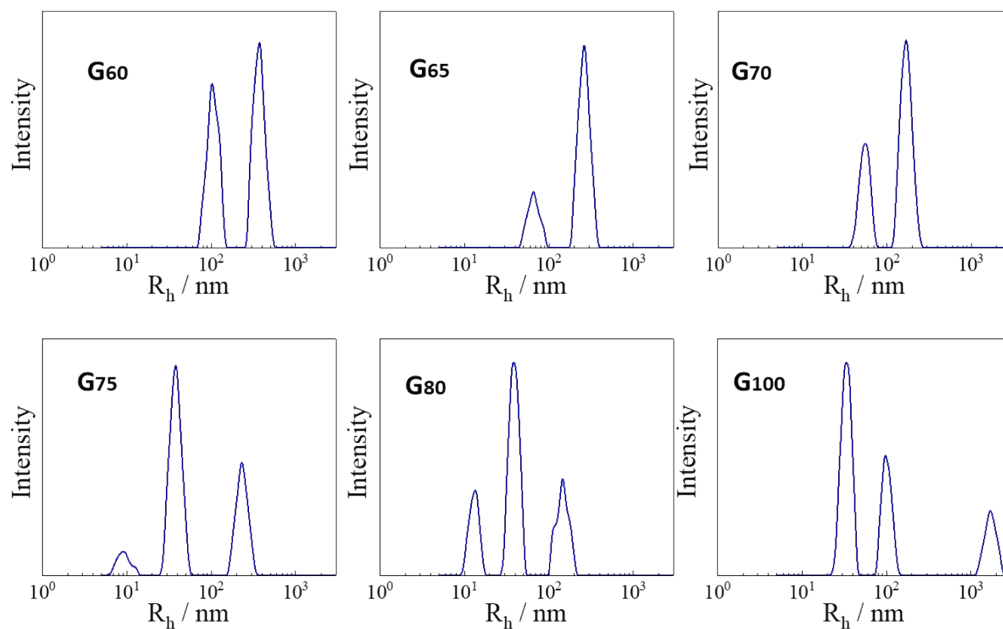

**Figure S3.** Intensity weighted distribution of apparent hydrodynamic diameter for 2wt% smart fluids with different proportions (G<sub>60</sub>, G<sub>65</sub>, G<sub>70</sub>, G<sub>75</sub>, G<sub>80</sub>, and G<sub>100</sub>).
